# Supplementary material
Source: PubMed Central journal article supplement (PMC5661869)
Supplement: NIHMS913546-supplement-Supplemental.pdf [file NIHMS913546-supplement-Supplemental.pdf]

## SUPPORTING INFORMATION

# NIR-emissive PEG-*b*-TCL Micelles for Breast Tumor Imaging and Minimally Invasive Pharmacokinetic Analysis

Christina L. Hofmann,<sup>a</sup> Melanie C. O'Sullivan,<sup>b</sup> Alexandre Detappe,<sup>c,d,e</sup> Yingjie Yu,<sup>c</sup> Xi Yang,<sup>c</sup> Wei Qi,<sup>b</sup> Chelsea D. Landon,<sup>f</sup> Michael J. Therien,<sup>b</sup> Mark W. Dewhirst,<sup>a,f,g</sup> P. Peter Ghoroghchian,<sup>c,d,e,\*</sup> and Gregory M. Palmer<sup>g,\*</sup>

<sup>a</sup> Biomedical Engineering Department, Duke University, Room 136 Hudson Hall, Durham, NC 27708, USA

<sup>b</sup> Department of Chemistry, Duke University, French Family Science Center, 124 Science Drive, Durham, NC 27708, USA

<sup>c</sup> Dana-Farber Cancer Institute, 450 Brookline Avenue, Boston MA, 02215, USA

<sup>d</sup> Harvard Medical School, 25 Shattuck St, Boston, MA 02115

<sup>e</sup> Koch Institute for Integrative Cancer Research at Massachusetts Institute of Technology, 77 Massachusetts Avenue, Room 76-261F, Cambridge MA, 02139, USA

<sup>f</sup> Department of Pathology, Duke University Medical Center, Box 3455, Durham, NC 27710, USA

<sup>g</sup> Radiation Oncology Department, Duke University Medical Center, Box 3455, Durham, NC 27710, USA

\*Co-senior authors and to whom correspondence should be addressed:

P. Peter Ghoroghchian, MD, PhD  
Koch Institute for Integrative Cancer Research  
77 Massachusetts Avenue, 76-261F  
Boston, MA 02139  
Tel: +1 (617) 715-4470  
Email: [ppg@mit.edu](mailto:ppg@mit.edu)

Greg Palmer, Ph.D.  
Radiation Oncology Department,  
Duke University Medical Center,  
Box 3455, Durham, NC 27710, USA,  
Tel: +1 (919) 613-5053, Fax: +1 (919) 684-8718,  
email: [greg.palmer@duke.edu](mailto:greg.palmer@duke.edu).

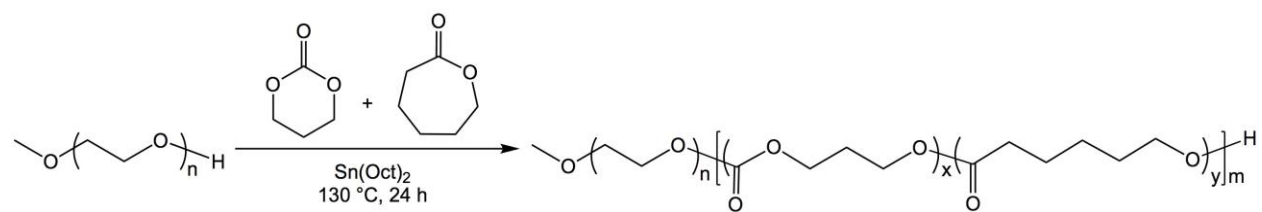

**Scheme S1:** Synthesis of PEG(2k)-*b*-TCL(11.2k) copolymer.

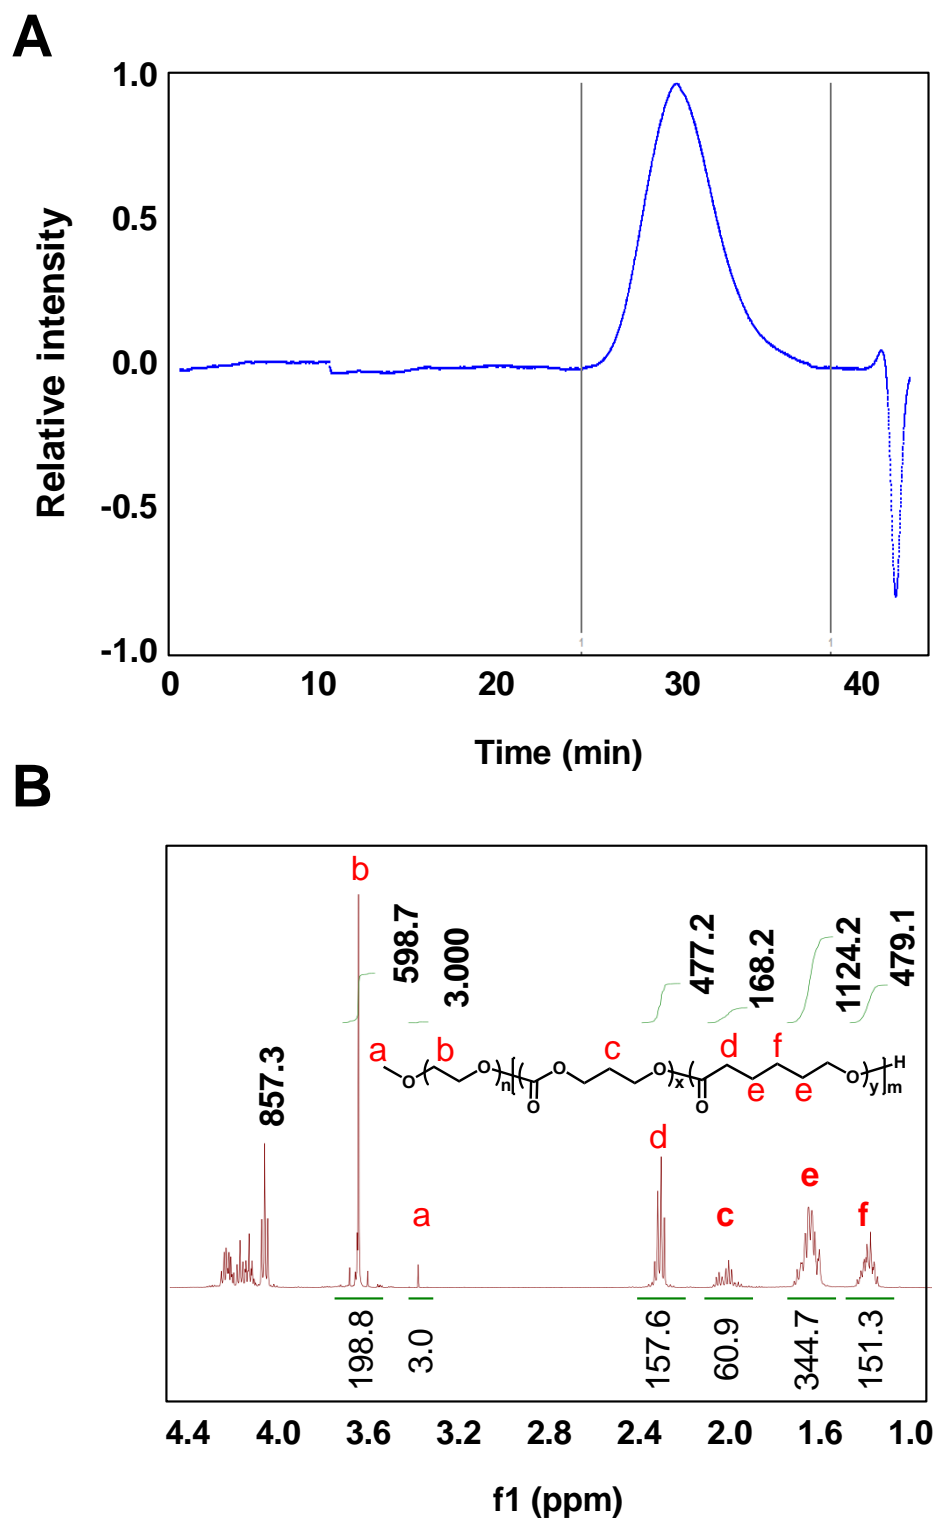

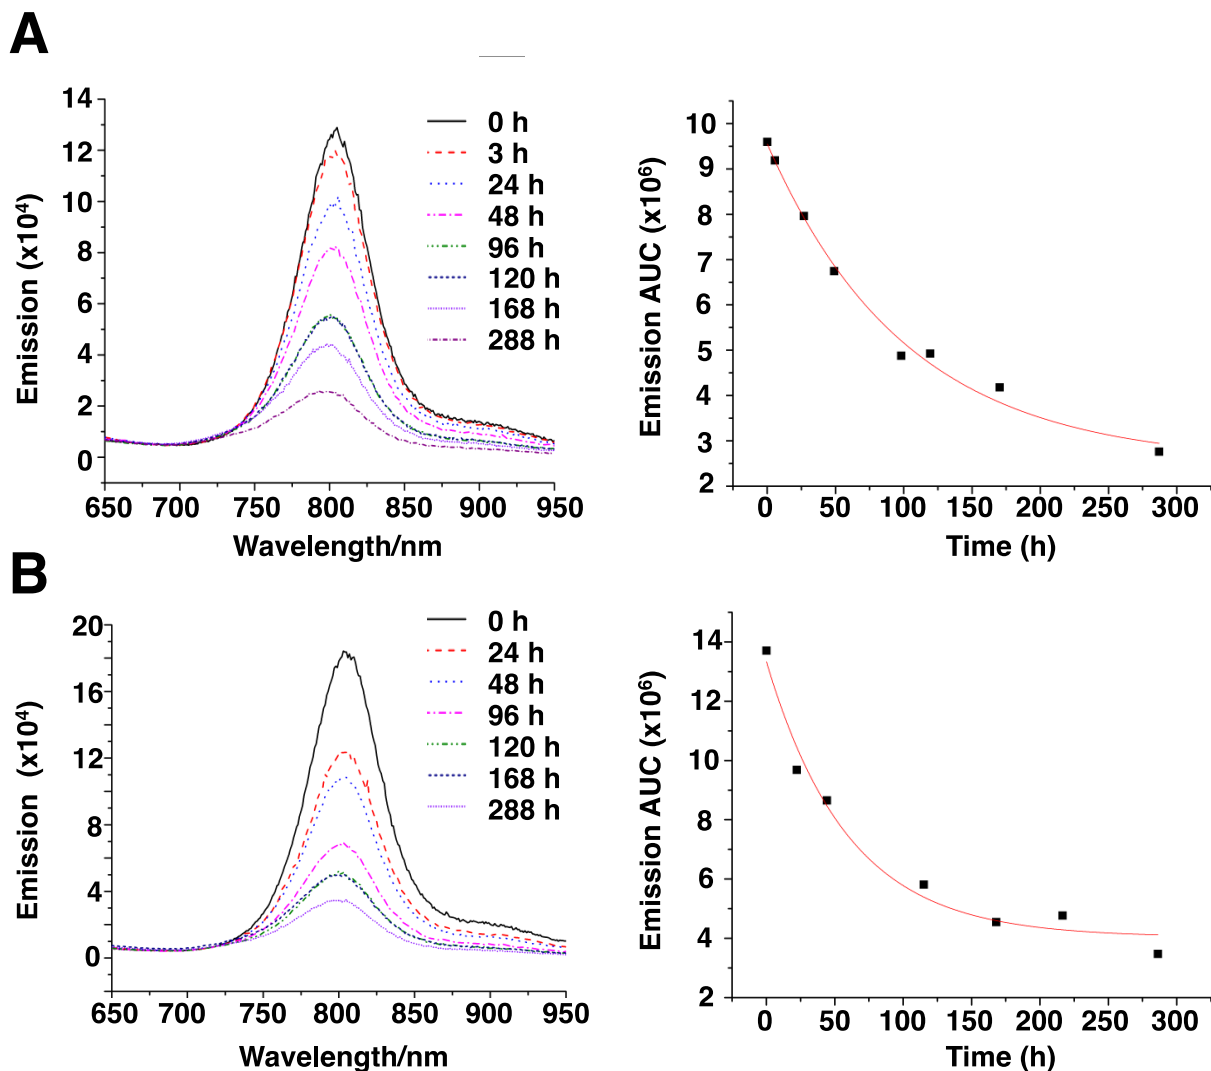

**Figure S2. Determination of the emission half-life of PZN<sub>3</sub> in a suspension of PEG-*b*-TCL-based micelles in plasma at 37 °C.** A total of 3 experimental runs were performed to determine changes in the emission spectra over a range of  $\lambda = 650$  to 950 nm (left) and to calculate the AUC of emission over time (right): (A) run 1, (B) run 2. The third experimental run is shown in Figure 2B. The half-life of emission of PZN<sub>3</sub>-loaded PEG-*b*-TCL-based micelles was determined from the decay constant of the slope of the exponential fit and the average value is reported in the main manuscript.

**A**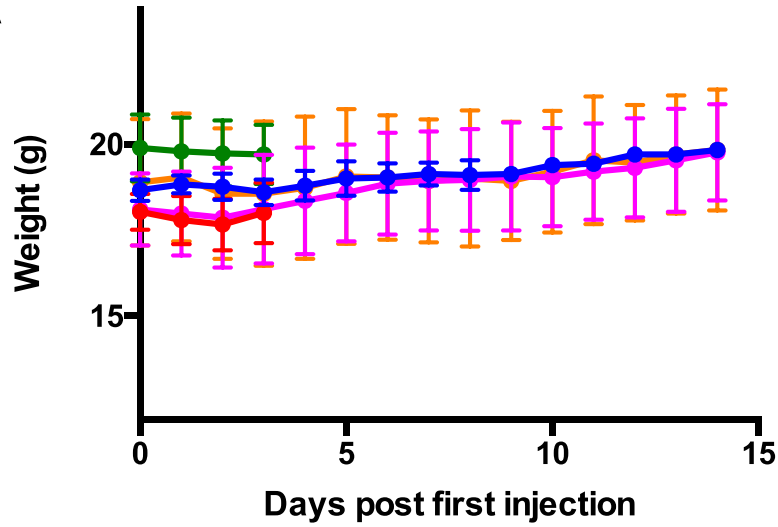

- PBS
- Empty PEG-b-TCL micelles at Day 3
- Empty PEG-b-TCL micelles at Day 14
- PZn3-loaded PEG-b-TCL micelles at 3 days
- PZn3-loaded PEG-b-TCL micelles at 14 days

**B**

| Treatment group                           | Mice tag | BUN | CREATININE |
|-------------------------------------------|----------|-----|------------|
| PBS Day 14                                | YY 905   | 23  | 0          |
|                                           | YY 906   | 20  | 0.2        |
|                                           | YY 908   | 18  | 0          |
| Empty PEG-b-TCL micelles at Day 3         | YY 901   | 28  | 0          |
|                                           | YY 903   | 25  | 0          |
|                                           | YY 904   | 23  | 0          |
| Empty PEG-b-TCL micelles at Day 14        | YY 902   | 22  | 0          |
|                                           | YY 909   | 20  | 0.1        |
|                                           | YY 912   | 26  | 0          |
| PZn3-loaded PEG-b-TCL micelles at 3 days  | YY 911   | 27  | 0          |
|                                           | YY 914   | 31  | 0          |
|                                           | YY 915   | 27  | 0          |
| PZn3-loaded PEG-b-TCL micelles at 14 days | YY 907   | 20  | 0          |
|                                           | YY 910   | 20  | 0.1        |
|                                           | YY 913   | 18  | 0          |

**C**

| Treatment group                           | Mice tag | ALK Phosphatase | ALT (SGPT) | AST(SGOT) | Total Bilirubin | Direct Bilirubin | Albumin |
|-------------------------------------------|----------|-----------------|------------|-----------|-----------------|------------------|---------|
| PBS Day 14                                | YY 905   | 97              | 52         | 262       | 0.7             | 0                | 3.2     |
|                                           | YY 906   | 98              | 25         | 62        | 0.1             | 0                | 2.8     |
|                                           | YY 908   | 86              | 28         | 108       | 0.2             | 0                | 2.6     |
| Empty PEG-b-TCL micelles at Day 3         | YY 901   | 93              | 95         | 436       | 0.7             | 0                | 3.6     |
|                                           | YY 903   | 94              | 46         | 132       | 0.4             | 0                | 3.2     |
|                                           | YY 904   | 99              | 54         | 200       | 0.5             | 0.1              | 3.4     |
| Empty PEG-b-TCL micelles at Day 14        | YY 902   | 100             | 188        | 330       | 0.2             | 0                | 2.4     |
|                                           | YY 909   | 91              | 27         | 80        | 0.1             | 0                | 2.6     |
|                                           | YY 912   | 104             | 59         | 128       | 0.2             | 0.1              | 2.5     |
| PZn3-loaded PEG-b-TCL micelles at 3 days  | YY 911   | 89              | 40         | 131       | 0.5             | 0                | 3       |
|                                           | YY 914   | 105             | 47         | 138       | 0.3             | 0                | 3.3     |
|                                           | YY 915   | 102             | 45         | 117       | 0.4             | 0                | 3.5     |
| PZn3-loaded PEG-b-TCL micelles at 14 days | YY 907   | 90              | 29         | 64        | 0.1             | 0.1              | 2.5     |
|                                           | YY 910   | 82              | 30         | 111       | 0.1             | 0                | 2.7     |
|                                           | YY 913   | 88              | 27         | 61        | 0.2             | 0.1              | 2.5     |

**D**

| Treatment group                           | Mice tag | WBC (K/ $\mu$ L) | Hb(g/dL) | HCT(%) | PLT(K/ $\mu$ L) |
|-------------------------------------------|----------|------------------|----------|--------|-----------------|
| PBS Day 14                                | YY 905   | 5                | 15.6     | 60.9   | 970             |
|                                           | YY 906   | 4.1              | 15.2     | 59     | 710             |
|                                           | YY 908   | 1.3              | 12.5     | 48.2   | 110             |
| Empty PEG-b-TCL micelles at Day 3         | YY 901   | 7                | 16.8     | 61.6   | 571             |
|                                           | YY 903   | 8.9              | 16       | 60.2   | 800             |
|                                           | YY 904   | 9.4              | 18.2     | 65.6   | 770             |
| Empty PEG-b-TCL micelles at Day 14        | YY 902   | 5.7              | 13.7     | 49.6   | 764             |
|                                           | YY 909   | 6.6              | 13.3     | 50.9   | 649             |
|                                           | YY 912   | 5.4              | 13.7     | 49.7   | 788             |
| PZn3-loaded PEG-b-TCL micelles at 3 days  | YY 911   | 7.8              | 15.1     | 59     | 983             |
|                                           | YY 914   | 6.5              | 17.3     | 64.1   | 792             |
|                                           | YY 915   | 8.7              | 13.5     | 51.1   | 817             |
| PZn3-loaded PEG-b-TCL micelles at 14 days | YY 907   | 8.6              | 13.9     | 53.6   | 840             |
|                                           | YY 910   | 5.7              | 13.7     | 52.8   | 761             |
|                                           | YY 913   | 2.8              | 11.8     | 43.9   | 347             |

**E**

| Treatment group                           | NE (K/ $\mu$ L) | LY (K/ $\mu$ L) | MO (K/ $\mu$ L) | EO (K/ $\mu$ L) |
|-------------------------------------------|-----------------|-----------------|-----------------|-----------------|
| PBS Day 14                                | 2.3             | 2.3             | 0.4             | 0               |
|                                           | 1.5             | 2.3             | 0.3             | 0               |
|                                           | 0.6             | 0.7             | 0.1             | 0               |
| Empty PEG-b-TCL micelles at Day 3         | 3.1             | 3.3             | 0.4             | 2.4             |
|                                           | 4.2             | 3.9             | 0.7             | 0.1             |
|                                           | 4               | 4.4             | 0.5             | 0.3             |
| Empty PEG-b-TCL micelles at Day 14        | 3.1             | 2.2             | 0.2             | 0.1             |
|                                           | 2.5             | 2.5             | 0.4             | 0.1             |
|                                           | 2.4             | 2.6             | 0.4             | 0               |
| PZn3-loaded PEG-b-TCL micelles at 3 days  | 3               | 4.3             | 0.4             | 0.1             |
|                                           | 2.7             | 3               | 0.8             | 0               |
|                                           | 3.6             | 4.5             | 0.4             | 0.2             |
| PZn3-loaded PEG-b-TCL micelles at 14 days | 4               | 3.9             | 0.5             | 0.2             |
|                                           | 3.1             | 2.2             | 0.2             | 0.1             |
|                                           | 1.1             | 1.5             | 0.2             | 0.1             |

**Figure S3.** Assessment of gross, serologic, and hematologic toxicities of BALB/c mice at 3 or 14 days after a single dose administration of PBS, empty (i.e. unloaded), or PZn<sub>3</sub>-loaded PEG-*b*-TCL micelles. The accompanying subfigures depict: A) the daily weights, B) the serology panel for biomarkers of renal function, C) the serology panel for biomarkers of hepatic function, D) the complete blood count (CBC) and E) the white blood cell differential counts; terminal blood draws were performed by cardiac puncture and major organs were harvested for H&E analysis (see Figure S4). White blood cell (WBC), hemoglobin (Hb), hematocrit (Hct), platelets (Plt), neutrophils (Ne), lymphocytes (Ly), monocytes (Mo), eosinophils (Eo), and Basophils (Ba).

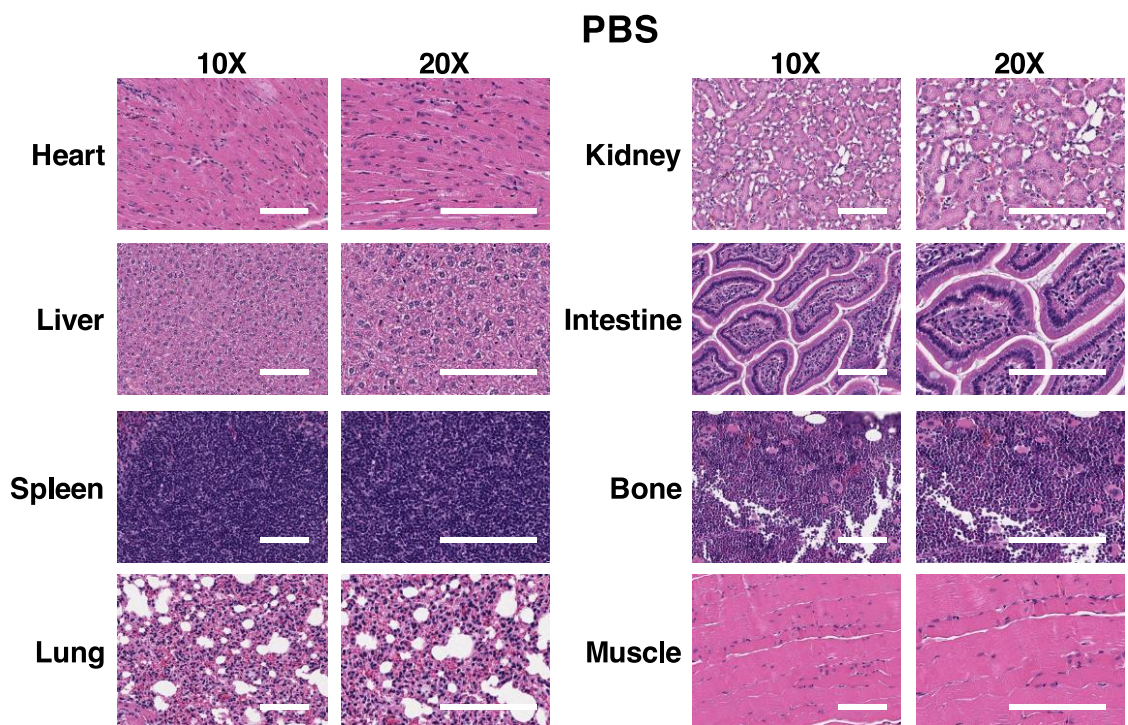

**Empty PEG-*b*-PCL micelles at Day 3**

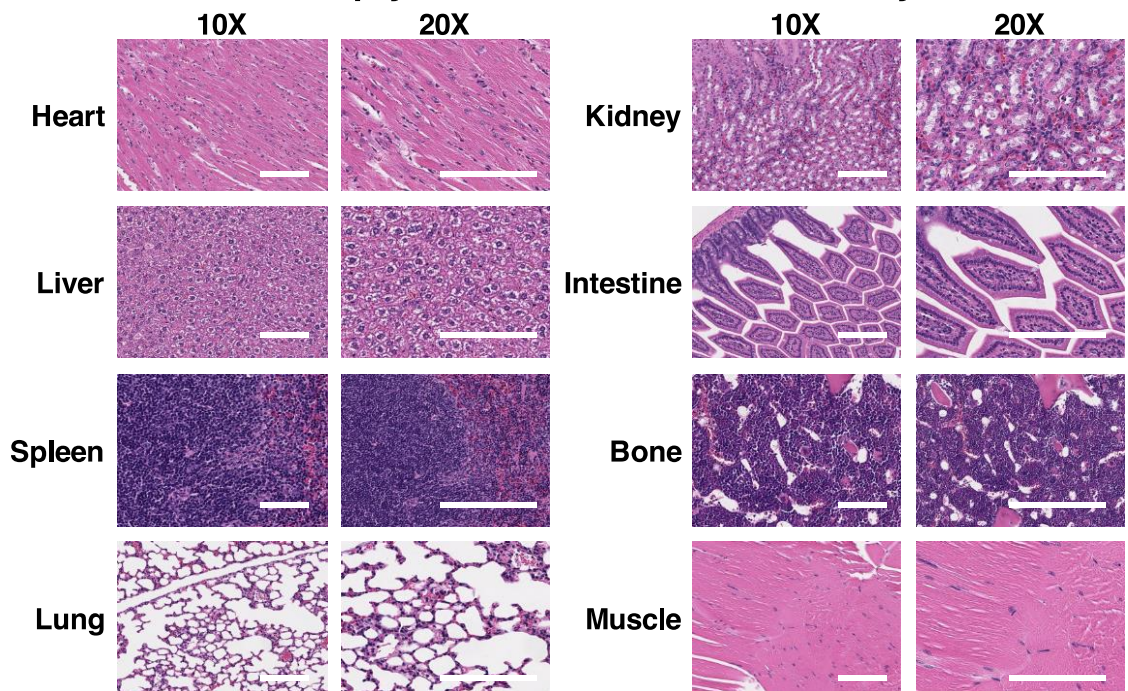



### Empty PEG-*b*-PCL micelles at Day 14

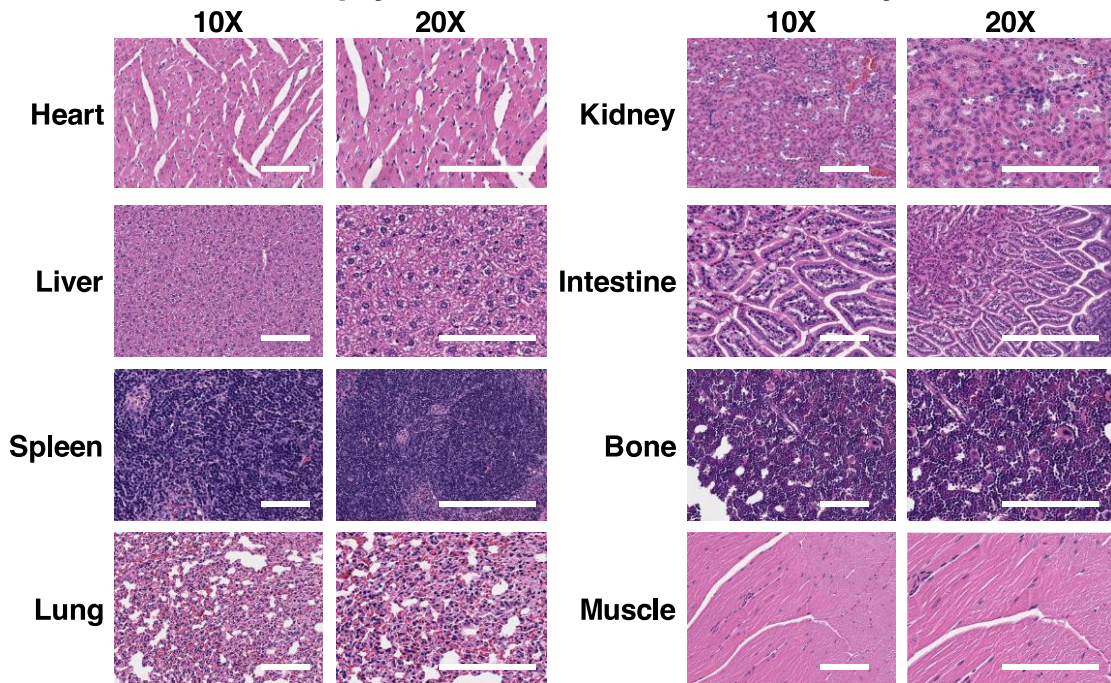

### PZn<sub>3</sub>-loaded PEG-*b*-PCL micelles at 3 days

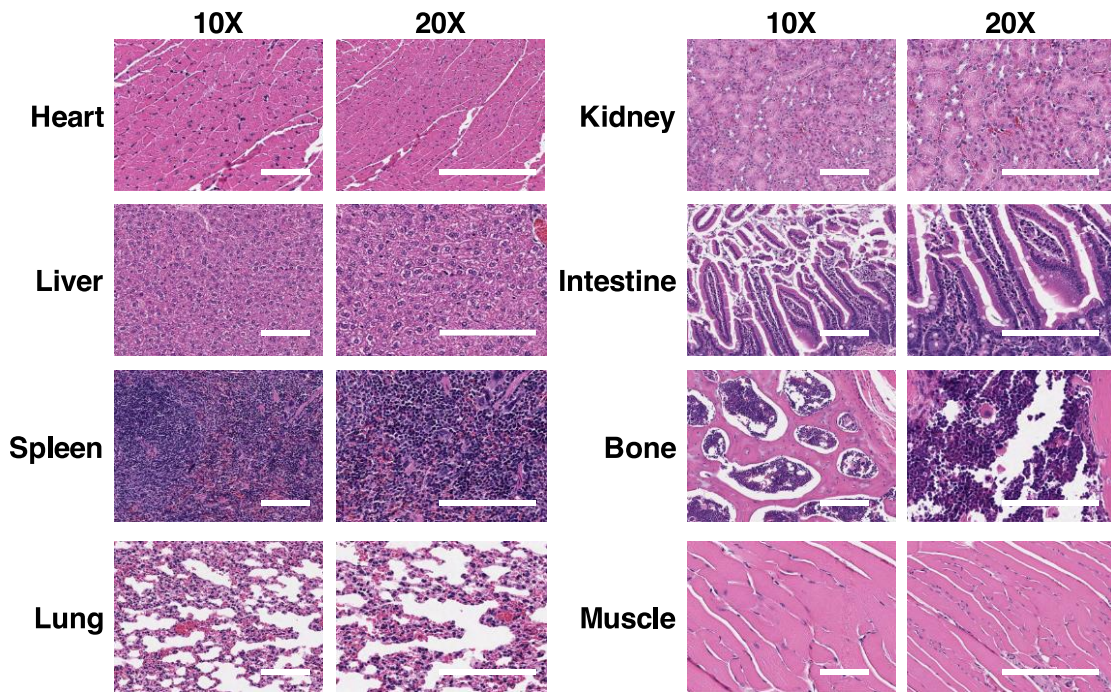

### PZn<sub>3</sub>-loaded PEG-*b*-PCL micelles at 14 days

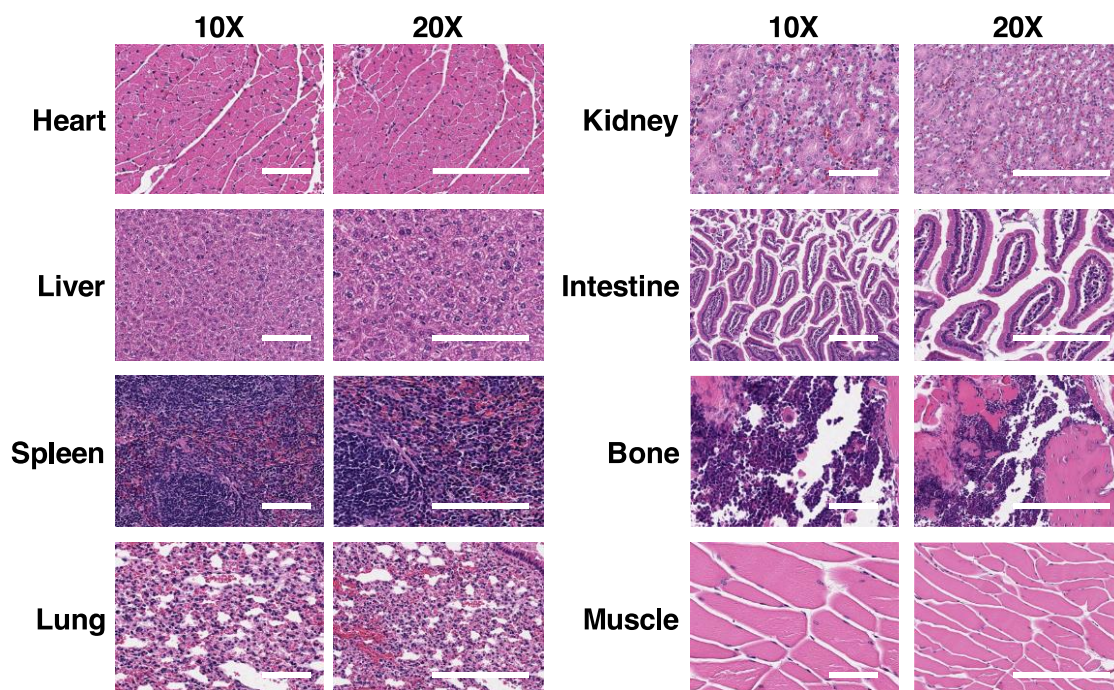

**Figure S4. H&E of organs harvested from BALB/c mice at 3 or 14 days after a single dose administration of PBS, empty (i.e. unloaded), or PZn<sub>3</sub>-loaded PEG-*b*-TCL micelles.** BALB/c mice at 4-6 weeks of age were randomly grouped (n=3 mice per group per time point). Each mouse was treated with a single dose of the following by IV administration: PBS, empty (i.e. unloaded) or PZn<sub>3</sub>-loaded PEG-*b*-TCL micelles. The mice were monitored and weighed daily; and, they were sacrificed at 3 days or at 14 days after administration. Scale bar: 200  $\mu$ m.

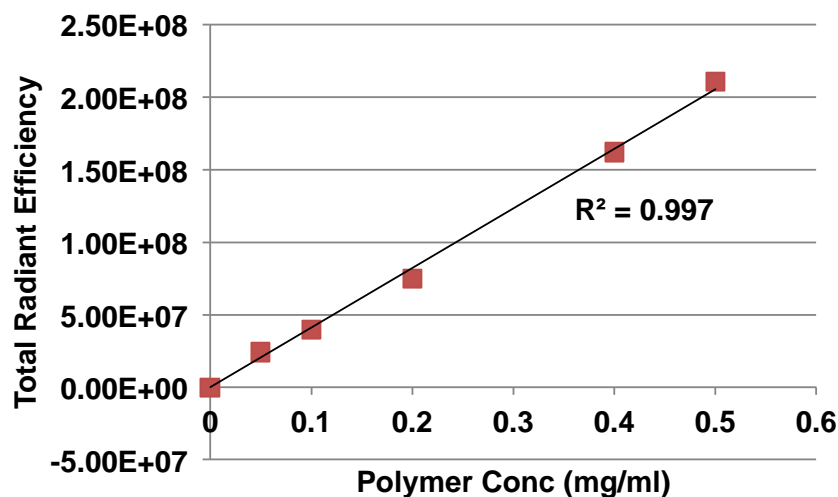

**Figure S5. Quantification of the concentration of PEG-*b*-TCL-based micelles based on the emission of PZn<sub>3</sub> loaded in their cavities.** Standard curves depicting the linear correlation between the fluorescence intensity of PZn<sub>3</sub> and the concentration of PZn<sub>3</sub>-loaded PEG-*b*-TCL-based micelles in plasma. The standard curve was generated using known concentrations of micelles that were added to mouse plasma, collected into heparinized capillary tubes, and imaged with the IVIS Kinetic<sup>®</sup> Imaging instrument ( $\lambda_{\text{ex}} = 745 \text{ nm}$ ,  $\lambda_{\text{em}} = 810\text{-}875 \text{ nm}$ ).

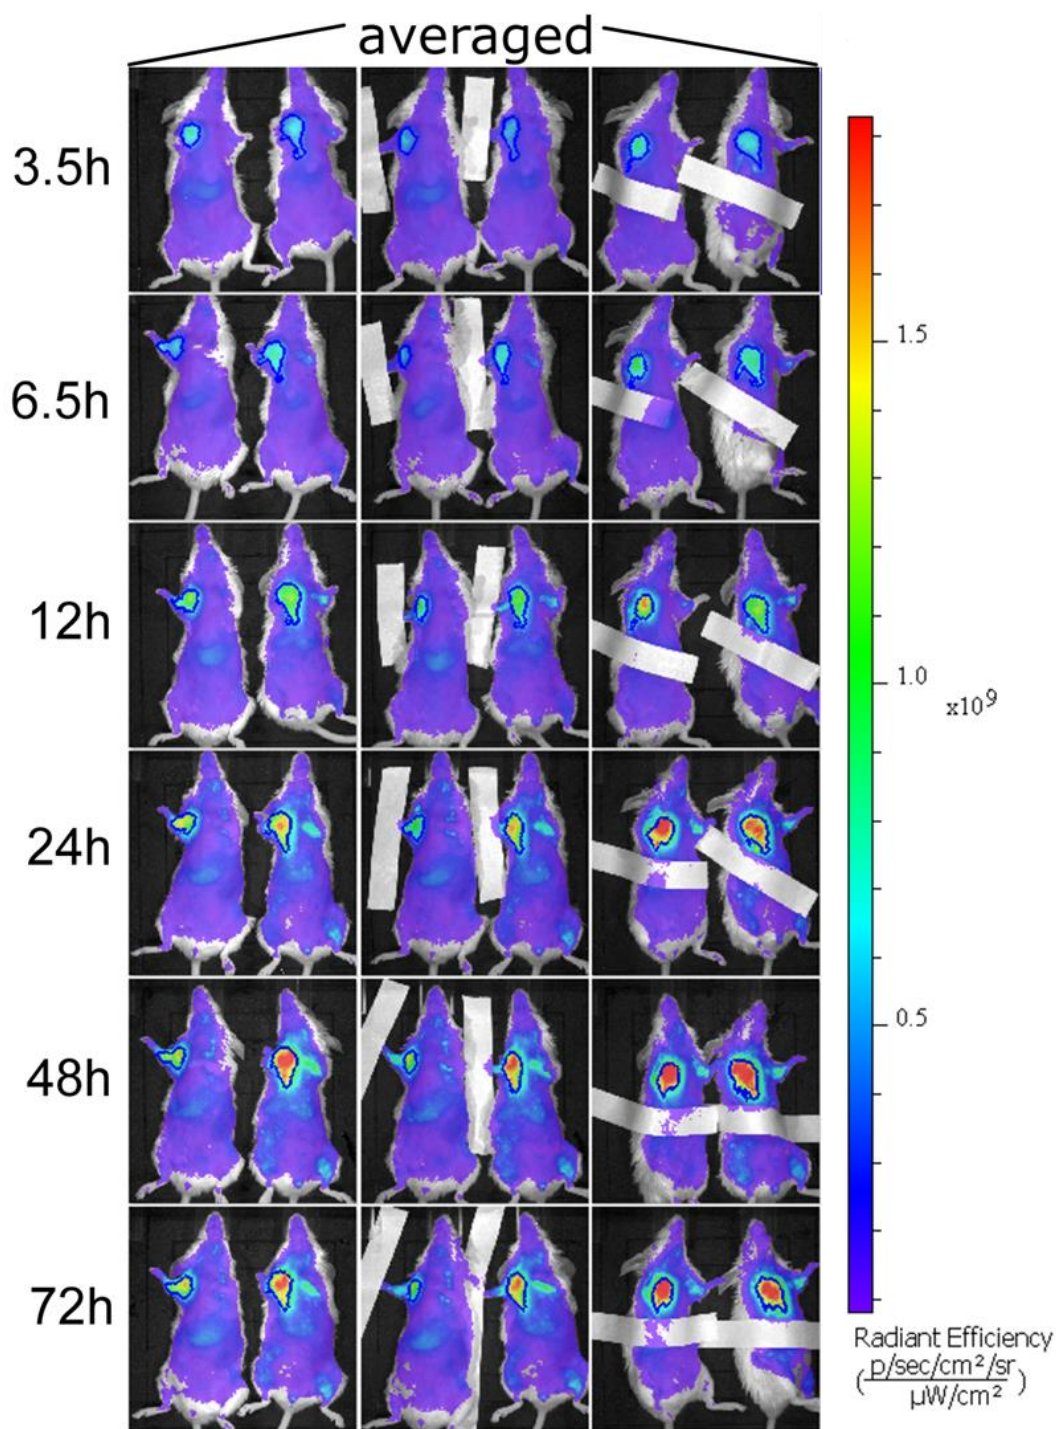

**Figure S6. *In vivo* tumor accumulation of PZn<sub>3</sub>-loaded PEG-*b*-TCL-based micelles.** Whole-animal optical imaging was performed to quantify PZn<sub>3</sub> fluorescence emission signals from micelles at various time points after systemic administration via IV tail-vein injection. Representative images demonstrate the 3 positions that were used for each mouse and at each time point to determine the average tumor radiant efficiencies. Mice were treated with 110 nm-diameter PZn<sub>3</sub>-loaded PEG-*b*-TCL-based micelles and were imaged using the IVIS<sup>®</sup> Kinetic Imaging instrument ( $\lambda_{\text{ex}} = 745 \text{ nm}$ ,  $\lambda_{\text{em}} = 810\text{-}875 \text{ nm}$ ).
